# Supplementary material
Source: PubMed Central journal article supplement (PMC7142301)

**FIG S1:** Flow chart detailing participants and isolates collected across the three universities.

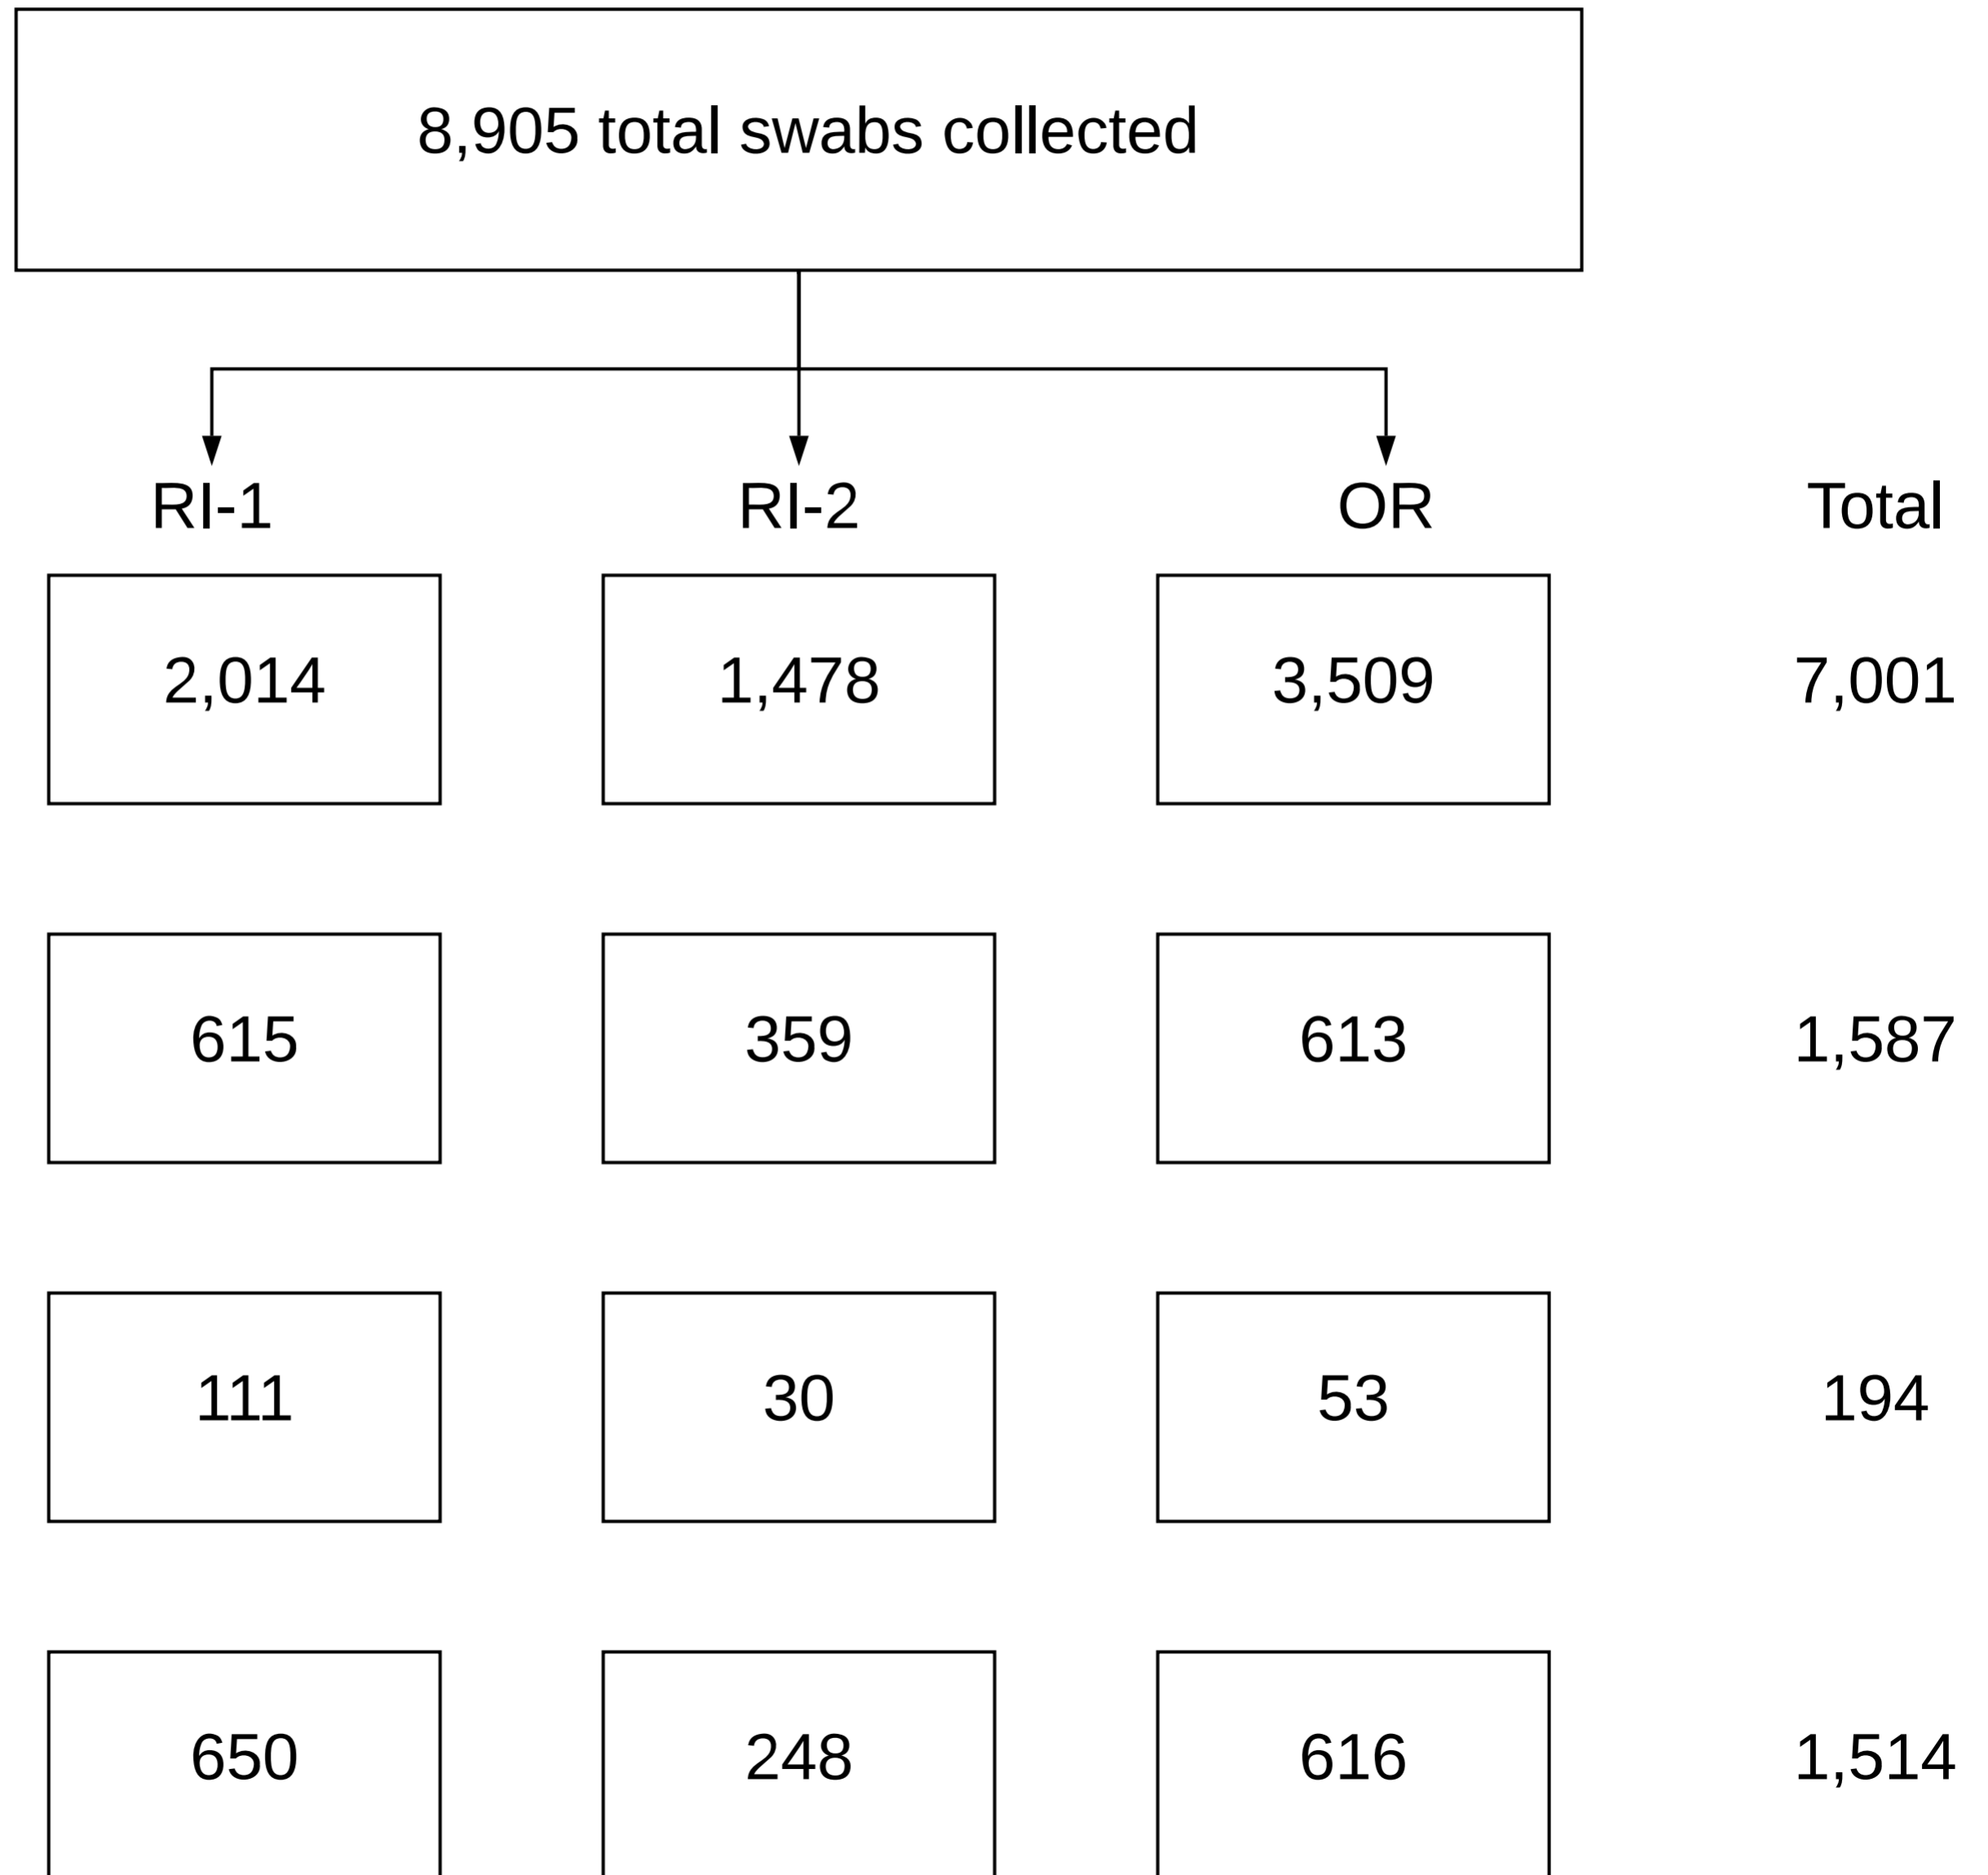

Supplement: mSphere.00197-20-sf001.pdf [file mSphere.00197-20-sf001.pdf]
